# Supplementary material for: The Ceramide Synthase Subunit Lac1 Regulates Cell Growth and Size in Fission Yeast
Source: MDPI journal article supplement (doi:10.3390/ijms23010303), 2021-12-28
Supplement: s1 [file s1]

## Supplementary Materials

A

*S. pombe*

Lac1  
Lag1

1 10 20 30 40 50 60 70 80 90 100 110 120

130 140 150 160 170 180 190 200 210 220 230 240 250 260

270 280 290 300 310 320 330 340 350 360 370 380

B

LAC1 (37.7% identical residues)

1 10 20 30 40 50 60

*S. pombe* ..... MGNNTSRSSQSQFKNISGSGS..... SSMPPVQHRGRRRRSKST..... VGRACNAVLRSKETWIDPL  
*S. cerevisiae* MSTIKPSPSNLNKYSRFRKSGIKERDLCDIVPSLGIMERKESKTAARRRMQRSEATKNDSDLVKKIWFSEISYRHWIAPL

70 80 90 100 110 120 130 140 150

*S. pombe* ILLLVGVYVFNNGYIK..YGHFISYPIPGTNPAGYCKRLDAFGIYALFPTFREFFIMQETIARIGRTFNTRAPALRRFEPQVYT  
*S. cerevisiae* ILFAYSAVYSCNTTKINVLHRTAVSYQIGDINAYCKGINDLCGVFYMIPTFREFFIMDVIRPFALHLVTSKHSIRIMSCQVYA

160 170 180 190 200 210 220 230 240

*S. pombe* CLFVFMGCGFYVWQGFVFFNDAFEEVVFVHYVGSFHSYILCAAHWQQAHPHLLQLEKPRKQERCLVVRHIFDLILLCLVYV  
*S. cerevisiae* IFVTCGCGPGLICVTHDEFFNDAFWRTYQGFNFPLFKQVYGGCAAHWQQAHPHLLQLEKPRKQHNLITFHHIDLLHWSVYV

250 260 270 280 290 300 310 320 330

*S. pombe* HFTWGLAVITMDHSDIWLALSKCLNYNTVIVVPIPIFVFIWYRRHYNGKINAVWGTMRNTNSFDLDALQYKCNISRDVTL  
*S. cerevisiae* HFTKGLPIITMDHSDFLSFSKTLNVDGLAFSFAITVVWIYRRHYNGKINAVWGTMRNTNSFDLDALQYKCNISLPLVVFV

340 350 360 370 380

*S. pombe* LIALQIVNYWIFLTLRGYRFTINDTFRDSRSDDEVSDEKSSAKKND.....  
*S. cerevisiae* LIALQIVNYWIFLTLRGYRLNRGILFRDSRSDDEVSDEKSSHTPTDSTPTKKDI

LAC1 (29.5% identical residues)

1 10 20 30 40 50 60 70

*S. pombe* MNRKADEKHHMSSSSITNDRSYIRNNSRRTSSRKRVITRTET.....PSNFVKDQTKLVQAFFLVWQKEIC.....SI  
*S. cerevisiae* MISTADKSID...RLVNAKTRRANSVGGIDLDGTVFGFAAMPSSAASKNEAKRRKALCDKKSDSLWKKVWFYSYRINRHSWLTFF

80 90 100 110 120 130 140 150 160

*S. pombe* AILC.ACLLSPSLPEYAE...FHSYKQDGGSYKCKDNCDFVYVFAAFVLMVVERPFVNWGVNRRVIRFCQQQSEFY  
*S. cerevisiae* ILVCVYSAYFLSGNATESRLHMAIASVQVDGTDSYKCKDNCDFVYVFAAFVLMVVERPFVNWGVNRRVIRFCQQQSEFY

170 180 190 200 210 220 230 240 250

*S. pombe* YLCFFWFGLYIYRSNNYSNE.EKIFEDYFOYMSFPAFYVLIHQGFHQQQL..VHLEORRADHNOVFABHIVCLHLLSYGNLRVKG  
*S. cerevisiae* CGVSGPFGLYIMYHSDIWLFKTKPMYRTFVITNPFDFRIYVGOAFWQQACVLVLEKPRRDYKSVFBBIVLLEWSSYVSHITKMC

260 270 280 290 300 310 320 330 340

*S. pombe* NALYIFSDTILSGGRMYVIGFGKICDTLFCIFVASHVSRHYDFSRILRVVNNAPEIIGCHDVPFGYIFNKPTVAFITHTFTQ  
*S. cerevisiae* LAIVITMDGDFLSLKRITNYNS.VFTPFVFGFVFFWYRRHYVNIILINSVHREFRH.EGNYVNFALQCKCNISLHVFVDAADQ

350 360 370 380 390

*S. pombe* LLIYWFGLIKVAYRDFSGEATDRSDDE...GRDEASSTNOK  
*S. cerevisiae* LNLVWLFTHRIYRINQGIQDRSDSDESASNSSEKKEC..

C

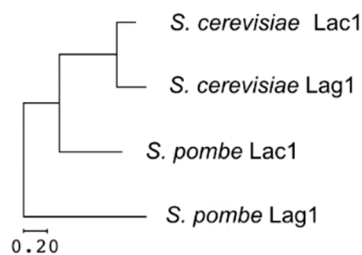

**Figure S1.** (A) Upper panel: sequence alignment between Lac1 subunits in fission and budding yeast. Lower panel: sequence alignment between the Lag1 subunits in fission and budding yeast. (B) Sequence alignment between ceramide synthase subunits in *S. pombe*, Lac1 and Lag1. White characters on red boxes denote identical residues, and red characters on white boxes denote conserved residues. (C) A phylogenetic tree using maximum-likelihood statistical method. Horizontal lines are proportional to the substitution rate. The bar represents 0.20 changes per amino acid. In panels A and B, white characters on red boxes denote identical residues, and red characters on white boxes denote conserved residues.

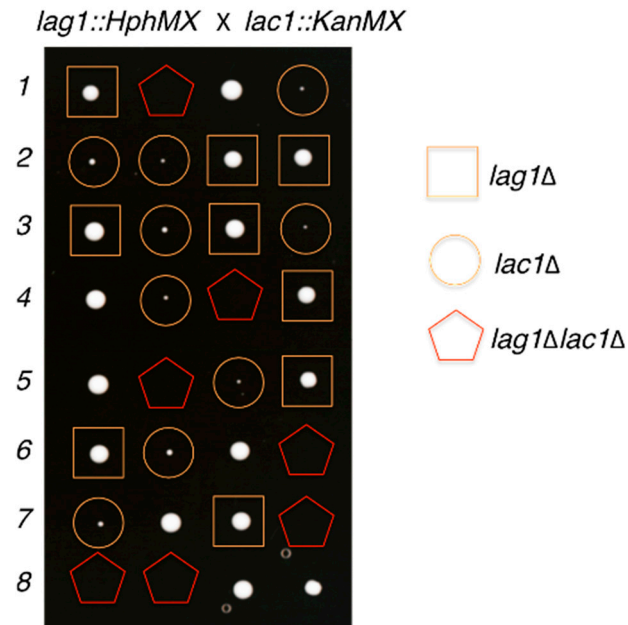

**Figure S2.** Deletion of Lac1 and Lag1 in *S. pombe* is lethal. Tetrad analysis of the indicated strains in Yes media at 25 °C.
